# Supplementary material for: Human dendritic cells activated with MV130 induce Th1, Th17 and IL‐10 responses via RIPK2 and MyD88 signalling pathways
Source: PubMed Central journal article supplement (PMC5813220; doi:10.1002/eji.201747024), 2017-09-14
Supplement: EJI-48-180-s001.pdf [file EJI-48-180-s001.pdf]

# European Journal of Immunology

**Supporting Information**

**for**

**DOI 10.1002/eji.201747024**

Cristina Cirauqui, Cristina Benito-Villalvilla, Silvia Sánchez-Ramón, Sofía Sirvent, Carmen M. Diez-Rivero, Laura Conejero, Paola Brandi, Lourdes Hernández-Cillero, Juliana Lucía Ochoa, Beatriz Pérez-Villamil, David Sancho, José Luis Subiza and Oscar Palomares

**Human dendritic cells activated with MV130 induce Th1, Th17 and IL-10 responses via RIPK2 and MyD88 signalling pathways**

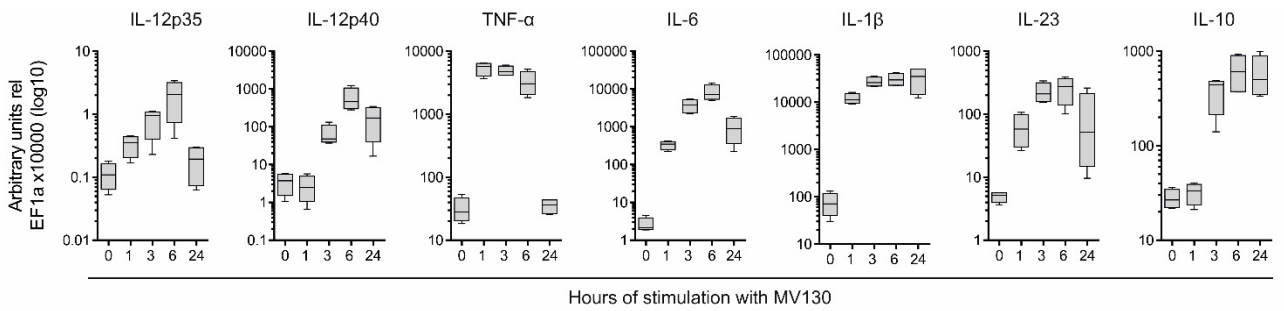

Cirauqui *et al.* Supplementary Figure 1

**Supplementary Figure 1.** Messenger RNA expression levels of IL-12p40, IL-12p35, TNF- $\alpha$ , IL-6, IL-1 $\beta$ , IL-23, and IL-10 genes in hmoDCs treated with MV130 for 0, 1, 3, 6 and 24 hours. Arbitrary units relative to EF1 $\alpha$  are  $2^{-\Delta\text{CT}}$  values multiplied by  $10^4$ , with  $\Delta\text{CT}$  defined as the difference between the cycle threshold value for the gene of interest and EF1 $\alpha$ . Data are the mean  $\pm$  s.e.m (n=4).

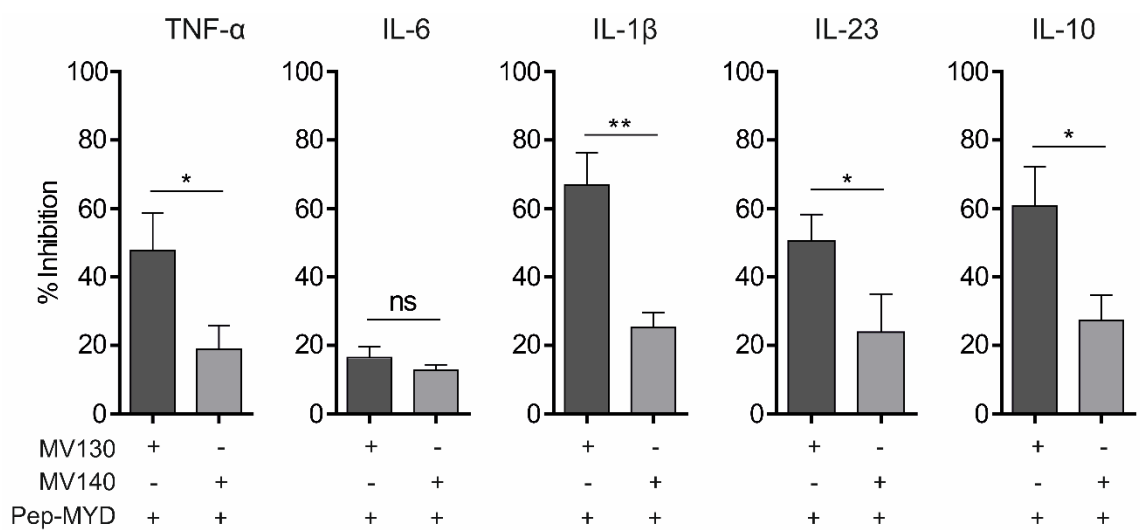

Cirauqui *et al.* Supplementary figure 2

**Supplementary Figure 2.** The graphs display the percentage of inhibition of TNF- $\alpha$ , IL-6, IL-1 $\beta$ , IL-23 and IL-10 production by MV130 or MV140-treated hmoDCs by the inhibitor Pepinh-MYD related to vehicle controls (Pepinh-Control). Results are the mean  $\pm$  s.e.m. (n=6-8). Unpaired t test \* P < 0.05, \*\* P < 0.01.
